# Supplementary material for: Shared Components of Worldwide Successful Sexuality Education Interventions for Adolescents: A Systematic Review of Randomized Trials
Source: MDPI journal article supplement (doi:10.3390/ijerph20054170), 2023-02-25
Supplement: s1 [file s1]

**TS2:** Filters and limits used for the search

| Database or platform | Filters and limits                                                                                                                                                                                                               |
|----------------------|----------------------------------------------------------------------------------------------------------------------------------------------------------------------------------------------------------------------------------|
| Web of Science (WoS) | Selection of "All fields"<br>Set publication date (from 2011-01-01)                                                                                                                                                              |
| CINAHL               | Deselect all search fields except from "Publication date" and "Age groups"<br>Set publication date (from January 2011)<br>Selection on "Age groups: Adolescence"                                                                 |
| PsycInfo             | Deselect all search fields except from "Publication date" and "Age groups"<br>Set publication date (from January 2011)<br>Set publication date (from January 2011)<br>Selection on "Age groups: Adolescence"                     |
| PubMed               | Selection of "All fields"<br>Deselect all search fields<br>Select: <ul style="list-style-type: none"><li>- Randomized Controlled Trial</li><li>- Custom range: from 2011-01-01</li><li>- Age: Adolescent (13-18 years)</li></ul> |
